# Supplementary material for: A Systematic Review of Literature on Representation of Racial and Ethnic Minority Groups in Clinical Nutrition Interventions
Source: Preprints.org preprint supplement (doi:10.20944/preprints202101.0629.v1), 2021-01-29
Supplement: Supplementary file 1 [file supplementary]

**Supplemental Methods: Details of Search Methods**

The databases (PubMed, Web of Science, and Cochrane Library) were searched from their inception until November 2019 by JD. The search was limited to clinical nutrition studies and examined the inclusion of racial or ethnic minority groups in human research trials. The titles of the articles were screened for duplicates by one reviewer (JD). The remaining articles were distributed among three authors (JD, AJ, and SO) and were screened, based on the established criterion, for consideration in the analysis/review.

| **Database** | **Web Address** | **Filter** | **Keywords** | **Total Articles** |
| --- | --- | --- | --- | --- |
| PubMed | <http://www.ncbi.nlm.nih.gov/pubmed/> | Human and clinical | (Nutrition OR diet) AND (Hispanic OR Asian OR Black OR African OR “Pacific Islander” OR Indian OR “American Indian” OR Latino OR Minority OR Race OR Ethnic) | 3604 |
| Web of Science | <https://login.webofknowledge.com/> | Article, Review, Nutrition & Dietetics | (Nutrition* OR diet*) AND (Hispanic OR Asian OR Black OR “African*” OR “Pacific Islander” OR Indian OR “American Indian” OR Latino OR Minorit* OR Race OR Racial OR Ethnic*) AND (clinical* OR trial OR “comparative stud*” OR “evaluation stud*” OR “controlled*” OR “follow-up stud*” OR “prospective stud*” OR random* OR placebo* OR crossover OR “parallel”) | 3042 |
| Cochrane Library | <https://www.cochranelibrary.com/> | Trials and source embase filters | (Nutrition* OR diet*) AND (Hispanic OR Asian OR Black OR “African*” OR “Pacific Islander” OR Indian OR “American Indian” OR Latino OR Minorit* OR Race OR Racial OR Ethnic*) AND (clinical* OR trial OR “comparative stud*” OR “evaluation stud*” OR “controlled*” OR “follow-up stud*” OR “prospective stud*” OR random* OR placebo* OR crossover OR “parallel”) | 3297 |
| PubMed | <http://www.ncbi.nlm.nih.gov/pubmed/> | Human and Meta-Analysis and Systematic Review | (Nutrition OR diet) AND (Race OR Ethnic) | 477 |
